# Supplementary material for: β-Catenin-NF-κB-CFTR interactions in cholangiocytes regulate inflammation and fibrosis during ductular reaction
Source: eLife journal article supplement (doi:10.7554/elife.71310), 2021-10-05

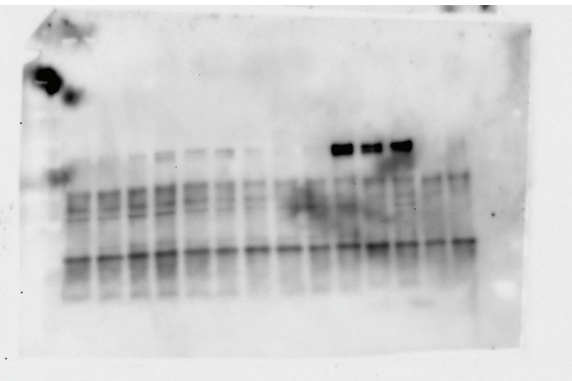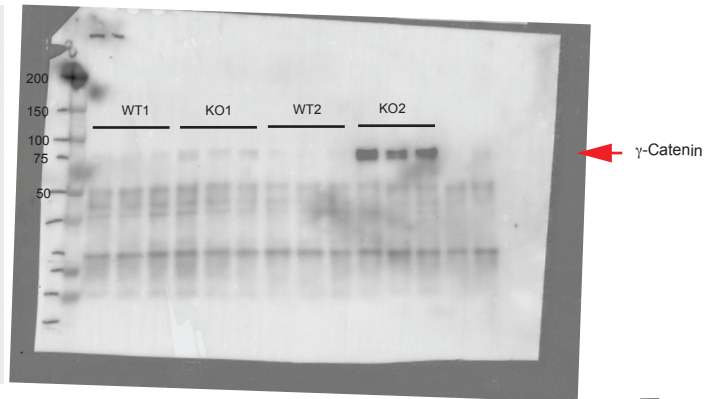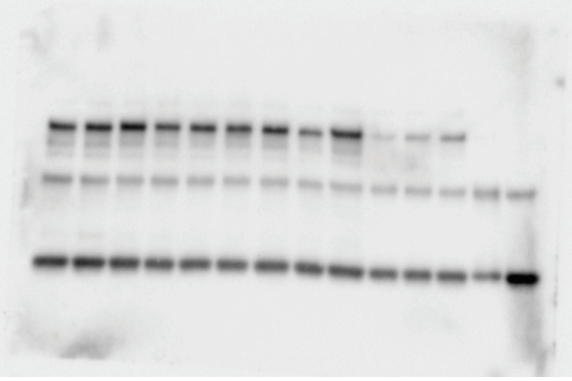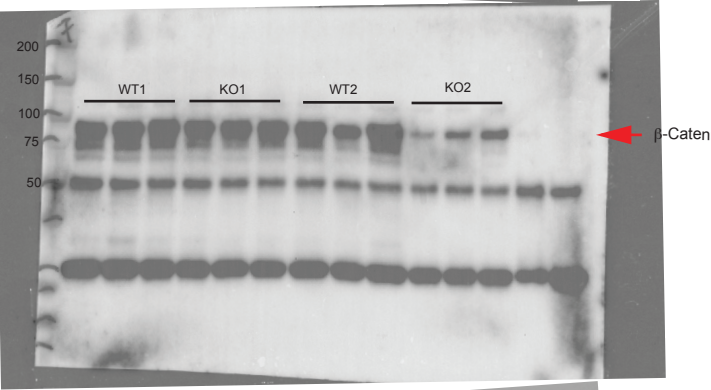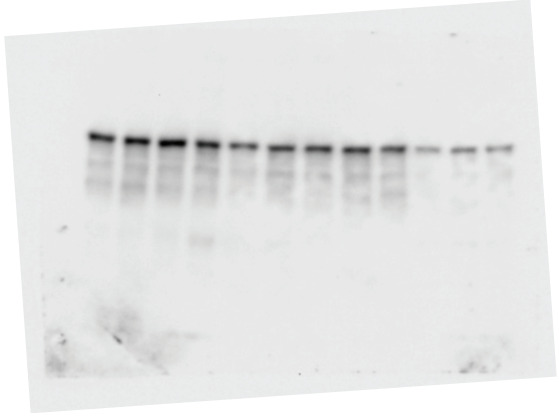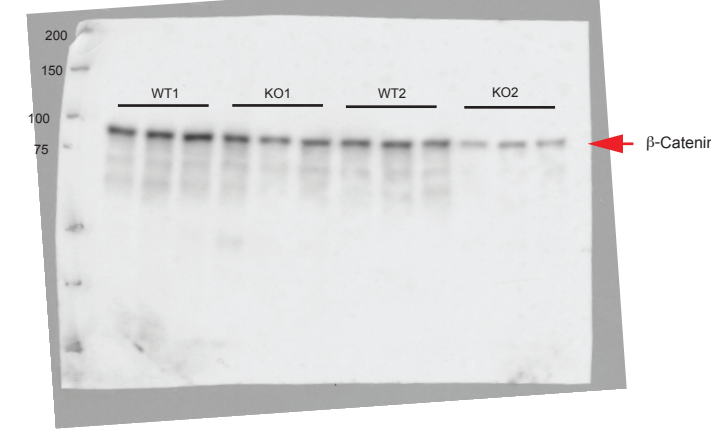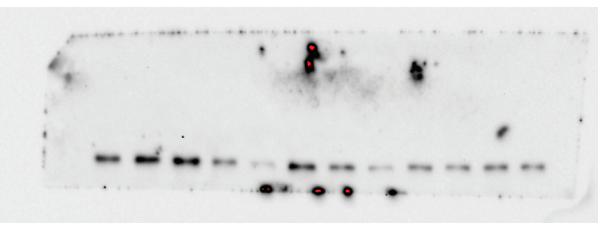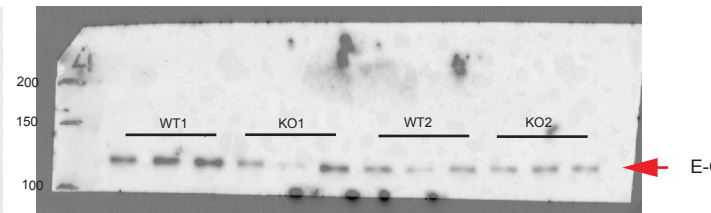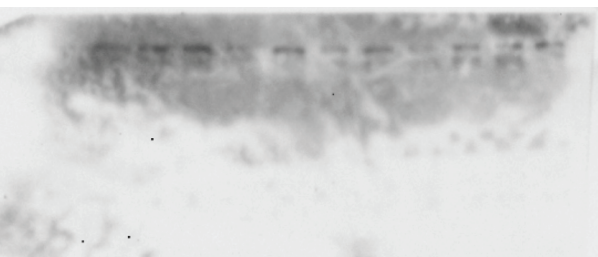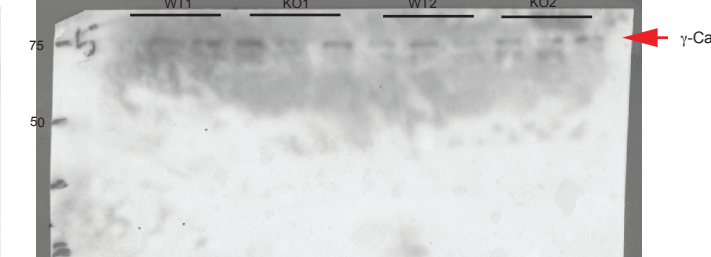

Supplement: fig4-figsupp3-data1 [file elife-71310-fig4-figsupp3-data1-v2.pdf]
